# Supplementary material
Source: MDPI journal article supplement (https://www.mdpi.com/2073-4441/13/6/760)
Supplement: s1 [file s1]

## Article

# A Morphological and Molecular Analysis of a Bloom of the Filamentous Green Alga *Pithophora*

Blia Lor <sup>1,2</sup>, Merry Zohn <sup>1,3</sup>, Marcus J. Meade <sup>4</sup>, A. Bruce Cahoon <sup>4</sup> and Kalina M. Manoylov <sup>1,\*</sup>

<sup>1</sup> Department of Biological and Environmental Sciences, Georgia College and State University, Milledgeville, GA 31061, USA; blia.lor@bobcats.gcsu.edu (B.L.); merry.zohn@bobcats.gcsu.edu (M.Z.)

<sup>2</sup> US AmeriCorps, Conservation Minnesota and Iowa, 60 Plato Blvd, Saint Paul, MN 55107, USA

<sup>3</sup> Oak Ridge Institute for Science and Education, Agricultural Research Services, U.S. Department of Agriculture, 600 E. Greenfield Ave., Milwaukee, WI 53204, USA

<sup>4</sup> Department of Natural Sciences, The University of Virginia's College at Wise, 1 College Ave., Wise, VA 24293, USA; mjm6mv@uvawise.edu (M.J.M.); abc6c@uvawise.edu (A.B.C.)

\* Correspondence: kalina.manoylov@gcsu.edu; Tel.: +01-478-445-2439

**Citation:** Lor, B.; Zohn, M.; Meade, M.J.; Cahoon, B.; Manoylov, K.M. A morphological and molecular analysis of a bloom of the filamentous green alga *Pithophora*. *Water* **2021**, *13*, x. <https://doi.org/10.3390/w13060760>

Academic Editor: John R. Beaver

Received: 25 January 2021

Accepted: 6 March 2021

Published: 11 March 2021

**Publisher's Note:** MDPI stays neutral with regard to jurisdictional claims in published maps and institutional affiliations.

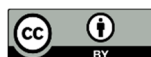

**Copyright:** © 2021 by the authors. Licensee MDPI, Basel, Switzerland. This article is an open access article distributed under the terms and conditions of the Creative Commons Attribution (CC BY) license (<http://creativecommons.org/licenses/by/4.0/>).

Consensus AACC AAAATCCATGAATYATCTCTKXACAGATTATAGGKCTGCTTGACATN  
atpB - P. sp. (UTEX 787) AACCAAACTCCATGAATCTATCTTTTACAGATTATAGGCTCTGCTTGACATAC  
atpB - P.r. - coding region ATGAATTTATCTTTTACAGATTATAGGCTCTGCTTGACATAC

Consensus GANAMATTMARTAYRAAGTTCCATCAGCTGGTGTTCRTTATGATTCHATAAATG  
atpB - P. sp. (UTEX 787) GANAMATTMARTAYRAAGTTCCATCAGCTGGTGTTCRTTATGATTCHATAAATG  
atpB - P.r. - coding region GANAMATTMARTAYRAAGTTCCATCAGCTGGTGTTCRTTATGATTCHATAAATG

Consensus AATGGAGTTACATGAGAAGTTCAACAATTATTTGGTGATGGNATAGTCGCTCTGTAG  
atpB - P. sp. (UTEX 787) AATGGAGTTACATGAGAAGTTCAACAATTATTTGGTGATGGNATAGTCGCTCTGTAG  
atpB - P.r. - coding region AATGGAGTTACATGAGAAGTTCAACAATTATTTGGTGATGGNATAGTCGCTCTGTAG

Consensus ATGAGTAGTACTGATGGCTTAGGCTGGAAATCCAGCTAACACATCTGGAAATCAA  
atpB - P. sp. (UTEX 787) ATGAGTAGTACTGATGGCTTAGGCTGGAAATCCAGCTAACACATCTGGAAATCAA  
atpB - P.r. - coding region ATGAGTAGTACTGATGGCTTAGGCTGGAAATCCAGCTAACACATCTGGAAATCAA

Consensus CATATATCAGTTGMAAYGGAACCTTGGGCGTATATTAAGTATTAGGTGAACCA  
atpB - P. sp. (UTEX 787) CATATATCAGTTGMAAYGGAACCTTGGGCGTATATTAAGTATTAGGTGAACCA  
atpB - P.r. - coding region CATATATCAGTTGMAAYGGAACCTTGGGCGTATATTAAGTATTAGGTGAACCA

Consensus GATGGTAAGGACCGTTAATTCGATATGATGCTATTCATAGGCTGGACCTT  
atpB - P. sp. (UTEX 787) GATGGTAAGGACCGTTAATTCGATATGATGCTATTCATAGGCTGGACCTT  
atpB - P.r. - coding region GATGGTAAGGACCGTTAATTCGATATGATGCTATTCATAGGCTGGACCTT

Consensus TTTATTGATTAGATACAACTTAGCTATCTTTGAACTGGTATTAGGTGTAGAG  
atpB - P. sp. (UTEX 787) TTTATTGATTAGATACAACTTAGCTATCTTTGAACTGGTATTAGGTGTAGAG  
atpB - P.r. - coding region TTTATTGATTAGATACAACTTAGCTATCTTTGAACTGGTATTAGGTGTAGAG

Consensus TTAGCACCCTATAAACCAGGAGGAAAGGATAGGCTTGTGGTGGTGGAGGTTG  
atpB - P. sp. (UTEX 787) TTAGCACCCTATAAACCAGGAGGAAAGGATAGGCTTGTGGTGGTGGAGGTTG  
atpB - P.r. - coding region TTAGCACCCTATAAACCAGGAGGAAAGGATAGGCTTGTGGTGGTGGAGGTTG

Consensus AAGACGGTTTATAATGGAACCTTATAAATATGCTAAAGCTCATAGTGGAGTT  
atpB - P. sp. (UTEX 787) AAGACGGTTTATAATGGAACCTTATAAATATGCTAAAGCTCATAGTGGAGTT  
atpB - P.r. - coding region AAGACGGTTTATAATGGAACCTTATAAATATGCTAAAGCTCATAGTGGAGTT

Consensus GTTTTGGTGGAGTTGGAGAACGTACAGCTGAGGCTAATGATCTATATGCGAAATGT  
atpB - P. sp. (UTEX 787) GTTTTGGTGGAGTTGGAGAACGTACAGCTGAGGCTAATGATCTATATGCGAAATGT  
atpB - P.r. - coding region GTTTTGGTGGAGTTGGAGAACGTACAGCTGAGGCTAATGATCTATATGCGAAATGT

Consensus GAATCTAAGGTTATTGTCTGATAATCTACACAAATCAAAGTAGCTTAGTTTATG  
atpB - P. sp. (UTEX 787) GAATCTAAGGTTATTGTCTGATAATCTACACAAATCAAAGTAGCTTAGTTTATG  
atpB - P.r. - coding region GAATCTAAGGTTATTGTCTGATAATCTACACAAATCAAAGTAGCTTAGTTTATG

Consensus CAATGAATGAGCCCTGCTGCAAGAAATGCGTGTGGTGTATCTGCGATTAAACAGTAG  
atpB - P. sp. (UTEX 787) CAATGAATGAGCCCTGCTGCAAGAAATGCGTGTGGTGTATCTGCGATTAAACAGTAG  
atpB - P.r. - coding region CAATGAATGAGCCCTGCTGCAAGAAATGCGTGTGGTGTATCTGCGATTAAACAGTAG

Consensus GATCATTTCGAGATGTAATCAACAGATGATTTATTTATTTATGATAATATTTCA  
atpB - P. sp. (UTEX 787) GATCATTTCGAGATGTAATCAACAGATGATTTATTTATTTATGATAATATTTCA  
atpB - P.r. - coding region GATCATTTCGAGATGTAATCAACAGATGATTTATTTATTTATGATAATATTTCA

Consensus TTTGTACAAGCCGAGCTGAAGTATCAGCATTATTGGGCGTTTACCAAGCGCTGTG  
atpB - P. sp. (UTEX 787) TTTGTACAAGCCGAGCTGAAGTATCAGCATTATTGGGCGTTTACCAAGCGCTGTG  
atpB - P.r. - coding region TTTGTACAAGCCGAGCTGAAGTATCAGCATTATTGGGCGTTTACCAAGCGCTGTG

Consensus TATCAACCAACTTTTGCACGGAATGGAGCTTCAAGACGAATTAATCTTCCACAT  
atpB - P. sp. (UTEX 787) TATCAACCAACTTTTGCACGGAATGGAGCTTCAAGACGAATTAATCTTCCACAT  
atpB - P.r. - coding region TATCAACCAACTTTTGCACGGAATGGAGCTTCAAGACGAATTAATCTTCCACAT

Consensus TCYGGATCTATAACTCAATTCAGGCTGTATGTACACAGCAGACACATGACATGATC  
atpB - P. sp. (UTEX 787) TCYGGATCTATAACTCAATTCAGGCTGTATGTACACAGCAGACACATGACATGATC  
atpB - P.r. - coding region TCYGGATCTATAACTCAATTCAGGCTGTATGTACACAGCAGACACATGACATGATC

Consensus GGCAGCAACAACATTTATTCACCTAGATGCACTACAGTACTATCTAGAGCATTAG  
atpB - P. sp. (UTEX 787) GGCAGCAACAACATTTATTCACCTAGATGCACTACAGTACTATCTAGAGCATTAG  
atpB - P.r. - coding region GGCAGCAACAACATTTATTCACCTAGATGCACTACAGTACTATCTAGAGCATTAG

Consensus GCTAAGCTATTATCCGCAAGTAGATGATTAGATTCTACTTCAACAATGTTACAGC  
atpB - P. sp. (UTEX 787) GCTAAGCTATTATCCGCAAGTAGATGATTAGATTCTACTTCAACAATGTTACAGC  
atpB - P.r. - coding region GCTAAGCTATTATCCGCAAGTAGATGATTAGATTCTACTTCAACAATGTTACAGC

Consensus TGGATAGTTGGTAAGAATCATATGAATGAGCTCAACAGTTCAGAAACACTTCAAC  
atpB - P. sp. (UTEX 787) TGGATAGTTGGTAAGAATCATATGAATGAGCTCAACAGTTCAGAAACACTTCAAC  
atpB - P.r. - coding region TGGATAGTTGGTAAGAATCATATGAATGAGCTCAACAGTTCAGAAACACTTCAAC

Consensus TATAATCAGCTTCAAGATATAATAGCAATATTAGGCTCGATGATTTATCAGAAGAG  
atpB - P. sp. (UTEX 787) TATAATCAGCTTCAAGATATAATAGCAATATTAGGCTCGATGATTTATCAGAAGAG  
atpB - P.r. - coding region TATAATCAGCTTCAAGATATAATAGCAATATTAGGCTCGATGATTTATCAGAAGAG

Consensus GGTCTCTGTATCAGGAGCAAGAAATTTGAAGATCTTATCTCAGCATCTTTTG  
atpB - P. sp. (UTEX 787) GGTCTCTGTATCAGGAGCAAGAAATTTGAAGATCTTATCTCAGCATCTTTTG  
atpB - P.r. - coding region GGTCTCTGTATCAGGAGCAAGAAATTTGAAGATCTTATCTCAGCATCTTTTG

Consensus GCGAATTCCTTACTAATAGTCCGGAGCTTATGTAAAGTTGCAAGAACTATATTT  
atpB - P. sp. (UTEX 787) GCGAATTCCTTACTAATAGTCCGGAGCTTATGTAAAGTTGCAAGAACTATATTT  
atpB - P.r. - coding region GCGAATTCCTTACTAATAGTCCGGAGCTTATGTAAAGTTGCAAGAACTATATTT

Consensus TTTAAAGCAAACTAAGTGGTAGTTTATGATAATATTAATGAAATGAATCTATTTA  
atpB - P. sp. (UTEX 787) TTTAAAGCAAACTAAGTGGTAGTTTATGATAATATTAATGAAATGAATCTATTTA  
atpB - P.r. - coding region TTTAAAGCAAACTAAGTGGTAGTTTATGATAATATTAATGAAATGAATCTATTTA

Consensus AGGTCGTTAGATAGATTATTAAGAAAGACGATAATTAG  
atpB - P. sp. (UTEX 787) AGGTCGTTAGATAGATTATTAAGAAAGACGATAATTAG  
atpB - P.r. - coding region AGGTCGTTAGATAGATTATTAAGAAAGACGATAATTAG

|                             |                                                            |
|-----------------------------|------------------------------------------------------------|
| Consensus                   | ATGGAAGCTATTACTCAAGCTGCATCAGTTTTAGCGGCTGCATTAAGTGTGGATTAT  |
| atpH – P. sp. (UTEX 787)    | ATGGAAGCTATTACTCAAGCTGCATCAGTTTTAGCGGCTGCATTAAGTGTGGATTAT  |
| atpH – P.r. – coding region | ATGGAAGCTATTACTCAAGCTGCATCAGTTTTAGCGGCTGCATTAAGTGTGGATTAT  |
| Consensus                   | GCAATWGGWCCTGGTATGGGTCAAGGTACAGCAGCCGGATATGCAGTTGAAGGAATTG |
| atpH – P. sp. (UTEX 787)    | ATAGGACCTGGTATGGGTCAAGGTACAGCAGCCGGATATGCAGTTGAAGGAATTG    |
| atpH – P.r. – coding region | GCAATGGCTCTGGTATGGGTCAAGGTACAGCAGCCGGATATGCAGTTGAAGGAATTG  |
| Consensus                   | CGACAGCCAGAAGCAGAAGGTAARATACGTGGAGCTCTCCTTCTATCATTGCTTTTA  |
| atpH – P. sp. (UTEX 787)    | CGACAGCCAGAAGCAGAAGGTAARATACGTGGAGCTCTCCTTCTATCATTGCTTTTA  |
| atpH – P.r. – coding region | CGACAGCCAGAAGCAGAAGGTAARATACGTGGAGCTCTCCTTCTATCATTGCTTTTA  |
| Consensus                   | GAGTCACTTTGTATTTATGGCTTAGTTATTAGCTTATCRATTCTATTGCTAATCCGT  |
| atpH – P. sp. (UTEX 787)    | GAGTCACTTTGTATTTATGGCTTAGTTATTAGCTTATCRATTCTATTGCTAATCCGT  |
| atpH – P.r. – coding region | GAGTCACTTTGTATTTATGGCTTAGTTATTAGCTTATCRATTCTATTGCTAATCCGT  |
| Consensus                   | RCTTAA                                                     |
| atpH – P. sp. (UTEX 787)    | ACT                                                        |
| atpH – P.r. – coding region | CTTAA                                                      |

[illegible]

Consensus ATAATATCAATATCTTATGGTTCGATGATAGATTGGGCTACAAGAGATTTAGACC  
 petB – P. sp (UTEX 787) CTACAAGAGATTTAGACC  
 petB – P.r. – coding region ATAATATCAATATCTTATGGTTCGATGATAGATTGGGCTACAAGAGATTTAGACC

Consensus GTTACTAGTAARTACGTACCTCCTCATGTTAACATCTTTTATTGCTTTGGYGGATTAC  
 petB – P. sp (UTEX 787) GTTACTAGTAACTACGTACCTCCTCATGTTAACATCTTTTATTGCTTTGGYGGATTAC  
 petB – P.r. – coding region GTTACTAGTAACTACGTACCTCCTCATGTTAACATCTTTTATTGCTTTGGYGGATTAC

Consensus CTTACAAGTTTATAATMCAAGGTGGAAGTGGATTGCTTTAACTTTTCATTACAGCC  
 petB – P. sp (UTEX 787) CTTACAAGTTTATAATCAAGGTGGAAGTGGATTGCTTTAACTTTTCATTACAGCC  
 petB – P.r. – coding region CTTACAAGTTTATAATCAAGGTGGAAGTGGATTGCTTTAACTTTTCATTACAGCC

Consensus TCAGTTAATGAAGCCTTAGCTAGYGTCTTAATATTCAAAGTAATGTCATTCCAGGAT  
 petB – P. sp (UTEX 787) TCAGTTAATGAAGCCTTAGCTAGYGTCTTAATATTCAAAGTAATGTCATTCCAGGAT  
 petB – P.r. – coding region TCAGTTAATGAAGCCTTAGCTAGYGTCTTAATATTCAAAGTAATGTCATTCCAGGAT

Consensus TTAATACGATCTGCWCATCGATGGGGAGCTCTTGAATGGTYTGATGCTTATACTAC  
 petB – P. sp (UTEX 787) TTAATACGATCTGCWCATCGATGGGGAGCTCTTGAATGGTYTGATGCTTATACTAC  
 petB – P.r. – coding region TTAATACGATCTGCWCATCGATGGGGAGCTCTTGAATGGTYTGATGCTTATACTAC

Consensus GTTTGACGAGTTTATCTAACTGGAGGATTTAARAAGCCWCGAGAGYTAACWTGGATMT  
 petB – P. sp (UTEX 787) GTTTGACGAGTTTATCTAACTGGAGGATTTAARAAGCCWCGAGAGYTAACWTGGATMT  
 petB – P.r. – coding region GTTTGACGAGTTTATCTAACTGGAGGATTTAARAAGCCWCGAGAGYTAACWTGGATMT

Consensus GGTRTKTTATTTRGCAGTATGTACAGTRCTTTTGGAGTAACKGGMTATTTCATTGCCAT  
 petB – P. sp (UTEX 787) GGTATTTATTTCAGTATGTACAGTCTTTTGGAGTAACKGGMTATTTCATTGCCAT  
 petB – P.r. – coding region GGTGTCTATTTCAGTATGTACAGTCTTTTGGAGTAACKGGMTATTTCATTGCCAT

Consensus GATCAAATTGGTTACTGGGCATTAMGAATAGTTTCYGGTGTAACMGATTGAATACCAA  
 petB – P. sp (UTEX 787) GATCAAATTGGTTACTGGGCATTAGAAATAGTTTCYGGTGTAACMGATTGAATACCAA  
 petB – P.r. – coding region GATCAAATTGGTTACTGGGCATTAGAAATAGTTTCYGGTGTAACMGATTGAATACCAA

Consensus ATAGGAGGTATTTAGTTGAACCTATTCGAGGAGGTCCAAGTGTGGKCAAGCAACTT  
 petB – P. sp (UTEX 787) ATAGGAGGTATTTAGTTGAACCTATTCGAGGAGGTCCAAGTGTGGKCAAGCAACTT  
 petB – P.r. – coding region ATAGGAGGTATTTAGTTGAACCTATTCGAGGAGGTCCAAGTGTGGKCAAGCAACTT

Consensus ACCCGTTTCTATAGYMTTCATACTTTTGACTTCNTTRATTACTACYGCKTTAATGC  
 petB – P. sp (UTEX 787) ACCCGTTTCTATAGCCTTCATACTTTTGACTTCGATTGATTACTACGGCTTAATGC  
 petB – P.r. – coding region ACCCGTTTCTATAGTTCATACTTTTGACTTCGCTTATTACTACGGCTTAATGC

Consensus TGACATTTTCTACTAATTCGTAAGCAGGGTATATCNGGRCTCTTTAA  
 petB – P. sp (UTEX 787) TGACATTTTCTACTAATTCGTAAGCAGGGTATATCAGCACCTCTT  
 petB – P.r. – coding region TGACATTTTCTACTAATTCGTAAGCAGGGTATATCNGGRCTCTTTAA

[illegible]

|                             |                                                            |
|-----------------------------|------------------------------------------------------------|
| Consensus                   | ATCTTTGCAACACGTTCAATATTTCTGGAACTCCAGGAGGTATCCGGCTTTGCTT    |
| psbC – P. sp. (UTEX 787)    | ATCTTTGCAACACGTTCAATATTTCTGGAACTCCAGGAGGTATCCGGCTTTGCTT    |
| psbC – P.r. – coding region |                                                            |
| Consensus                   | TGGGCTGGTAATGCGCTTACTAATTTATCTGGACAATTAYNTRGGTKCACATGTA    |
| psbC – P. sp. (UTEX 787)    | TGGGCTGGTAATGCGCTTACTAATTTATCTGGACAATTAC-TAGGTCCACATGTA    |
| psbC – P.r. – coding region | ATGCACTTACTAATTTATCTGGACAATTATTTGGTTCACATGTA               |
| Consensus                   | GCATGCGGTCTYATGGTTTTTGGGCGGAGCTATGACTYATTYGAANNNNNNNN      |
| psbC – P. sp. (UTEX 787)    | GCATGCTGGTCTTATGGTTTTTGGGCGGAGCTATGACTTATTGGAA             |
| psbC – P.r. – coding region | GCATGCGGTCTTATGGTTTTTGGGCGGAGCTATGACTTATTGGAGTTGGTCA       |
| Consensus                   | NNNNNNNNNNNNNNNNNNNNNNNNNNNNNNNNNNNNNNNNNNNNNNNNNNNN       |
| psbC – P. sp. (UTEX 787)    |                                                            |
| psbC – P.r. – coding region | TACAACGTATAAACCACTTTATGAACAAGGATGAATTCTAATCCCTCATTTAGCTACA |
| Consensus                   | NNNNNNNNNNNNNNNNNNNNNNNNNNNNNNNNNNNNNNNNNNNNNNNNNNNN       |
| psbC – P. sp. (UTEX 787)    | CTTAGGGGAGCTTATTGATACGATTCTAATTCTCGTTGTA                   |
| psbC – P.r. – coding region | AGGATTAGGACTTAGACCTAGTGGTGAATTATTGATACGATTCTAATTCTCGTTGTA  |
| Consensus                   | TRTMTTCACTTAATYCTTCAGCAGTWTAGGATTTGGAGGTATATTYCATTCARTA    |
| psbC – P. sp. (UTEX 787)    | TGTTTTCACCTAATCTTCAGCAGTATTAGGATTTGGAGGTATATTTCATTCARTA    |
| psbC – P.r. – coding region | TGTTTTCACCTAATCTTCAGCAGTATTAGGATTTGGAGGTATATTTCATTCARTA    |
| Consensus                   | YGGACCYGAAATAATAACGTCGGAGTCTTCGCTATTCYTGAAAGATAAGAATCAG    |
| psbC – P. sp. (UTEX 787)    | CGGACCTGAAATAATAACGTCGGAGTCTTCGCTATTCYTGAAAGATAAGAATCAG    |
| psbC – P.r. – coding region | TGGACCTGAAATAATAACGTCGGAGTCTTCGCTATTCYTGAAAGATAAGAATCAG    |
| Consensus                   | GACTTCMACTTGGATTTCAATTAATAATCTTGGGCTAGGTTNNNTYATTATNNNN    |
| psbC – P. sp. (UTEX 787)    | GACTTCMACTTGGATTTCAATTAATAATCTTGGGCTAGGTTTATTAT            |
| psbC – P.r. – coding region | GACTTCMACTTGGATTTCAATTAATAATCTTGGGCTAGGTTCCCTTATTATGGTA    |
| Consensus                   | NNNNNNNNNNNNNNNNNNNNNNNNNNNNNNNNNNNNNNNNNNNNNNNNNNNN       |
| psbC – P. sp. (UTEX 787)    | ATGGTGGTTTATGATCCATGGGCTCCTGTGKAGGAGATGTT                  |
| psbC – P.r. – coding region | GAAAGCTACTATTATGGTGGTTTATGATCCATGGGCTCCTGTGKAGGAGATGTT     |
| Consensus                   | ATTAATAWCTAATCCTACATTAAGYCCATAYACAATATTGGCTATCTTYYAATATCG  |
| psbC – P. sp. (UTEX 787)    | ATTAATAWCTAATCCTACATTAAGYCCATAYACAATATTGGCTATCTTYYAATATCG  |
| psbC – P.r. – coding region | ATTAATAWCTAATCCTACATTAAGYCCATAYACAATATTGGCTATCTTYYAATATCG  |
| Consensus                   | YTTYGGGGGTGATGGTTGGATTGTACGYRTAGATAAATTAGAAGATGTTATTGGAGGT |
| psbC – P. sp. (UTEX 787)    | CTTGGGGGTGATGGTTGGATTGTACGYRTAGATAAATTAGAAGATGTTATTGGAGGT  |
| psbC – P.r. – coding region | TTTGGGGGTGATGGTTGGATTGTACGYRTAGATAAATTAGAAGATGTTATTGGAGGT  |
| Consensus                   | CATMTTTATWKCCTTAATTGAAATATTGGTGGGNTYTGGCATCAGTTTACAAGTCC   |
| psbC – P. sp. (UTEX 787)    | CATMTTTATWKCCTTAATTGAAATATTGGTGGGNTYTGGCATCAGTTTACAAGTCC   |
| psbC – P.r. – coding region | CATMTTTATWKCCTTAATTGAAATATTGGTGGGNTYTGGCATCAGTTTACAAGTCC   |
| Consensus                   | GCMTTGGGCAAGTCGTTTGGTTGGTCAGGYGAAGCTTATTATCCTATTCCTTA      |
| psbC – P. sp. (UTEX 787)    | GCMTTGGGCAAGTCGTTTGGTTGGTCAGGYGAAGCTTATTATCCTATTCCTTA      |
| psbC – P.r. – coding region | GCMTTGGGCAAGTCGTTTGGTTGGTCAGGYGAAGCTTATTATCCTATTCCTTA      |
| Consensus                   | AGCACTYAGTCTWATGGGATTTATTCATGTTGATGGTATGRTTAAATAATACAGTT   |
| psbC – P. sp. (UTEX 787)    | AGCACTYAGTCTWATGGGATTTATTCATGTTGATGGTATGRTTAAATAATACAGTT   |
| psbC – P.r. – coding region | AGCACTYAGTCTWATGGGATTTATTCATGTTGATGGTATGRTTAAATAATACAGTT   |
| Consensus                   | TCCAGTGAGTTTATGGACCTACAGGACCAGAGGCTTCGAGTCTCAATCATTCA      |
| psbC – P. sp. (UTEX 787)    | TCCAGTGAGTTTATGGACCTACAGGACCAGAGGCTTCGAGTCTCAATCATTCA      |
| psbC – P.r. – coding region | TCCAGTGAGTTTATGGACCTACAGGACCAGAGGCTTCGAGTCTCAATCATTCA      |
| Consensus                   | YTTAGTACGAGATCAACGCTTGGTGCYCTGTTGCKAAGCCCAAGCKCTACTGGA     |
| psbC – P. sp. (UTEX 787)    | YTTAGTACGAGATCAACGCTTGGTGCYCTGTTGCKAAGCCCAAGCKCTACTGGA     |
| psbC – P.r. – coding region | YTTAGTACGAGATCAACGCTTGGTGCYCTGTTGCKAAGCCCAAGCKCTACTGGA     |
| Consensus                   | AGGKAAATANTYTNATAGATATACTTCAGGAGAGATTAGACTCGGAGGTAAAACATG  |
| psbC – P. sp. (UTEX 787)    | AGGKAAATANTYTNATAGATATACTTCAGGAGAGATTAGACTCGGAGGTAAAACATG  |
| psbC – P.r. – coding region | AGGKAAATANTYTNATAGATATACTTCAGGAGAGATTAGACTCGGAGGTAAAACATG  |
| Consensus                   | CTTCCGGGATCTTAGAACACCTTGA                                  |
| psbC – P. sp. (UTEX 787)    | CTTCCGGGATCTTAGAACACCTTGA                                  |
| psbC – P.r. – coding region |                                                            |

|                             |                                                              |
|-----------------------------|--------------------------------------------------------------|
| Consensus                   | ATGCAAAACAAACAGATCGGACAGGATTACAGCTGGTGTMMRATTATCRH           |
| rbCL – P. sp. (UTEX 787)    | ATGCAAAACAAACAGATCGGACAGGATTACAGCTGGTGTMMRATTATCACT          |
| rbCL – P.r. – coding region | ATGCAAAACAAACAGATCGGACAGGATTACAGCTGGTGTMMRATTATCACT          |
| Consensus                   | ACATA.TTAYATGAACATTATCAGGTTCAATYAAATGACCTGTTAGCGGCTTTAGAG    |
| rbCL – P. sp. (UTEX 787)    | ACATA.TTAYATGAACATTATCAGGTTCAATYAAATGACCTGTTAGCGGCTTTAGAG    |
| rbCL – P.r. – coding region | ACATA.TTAYATGAACATTATCAGGTTCAATYAAATGACCTGTTAGCGGCTTTAGAG    |
| Consensus                   | ATTTCCTAACCGAGGATACCACTGAGGAGCAGGAGCAGCAATTGCCGAGAATCAT      |
| rbCL – P. sp. (UTEX 787)    | ATTTCCTAACCGAGGATACCACTGAGGAGCAGGAGCAGCAATTGCCGAGAATCAT      |
| rbCL – P.r. – coding region | ATTTCCTAACCGAGGATACCACTGAGGAGCAGGAGCAGCAATTGCCGAGAATCAT      |
| Consensus                   | ACYGGAACTTGGACTACTGTATGACTGAYGGTTAACTAGTTTNGAGNKAAYAAAG      |
| rbCL – P. sp. (UTEX 787)    | ACYGGAACTTGGACTACTGTATGACTGAYGGTTAACTAGTTTNGAGNKAAYAAAG      |
| rbCL – P.r. – coding region | ACYGGAACTTGGACTACTGTATGACTGAYGGTTAACTAGTTTNGAGNKAAYAAAG      |
| Consensus                   | CGYTG.YTATGATATTGAATTAGTTCTCGTGAAGATAACCAATACATCCTTATATTC    |
| rbCL – P. sp. (UTEX 787)    | CGYTG.YTATGATATTGAATTAGTTCTCGTGAAGATAACCAATACATCCTTATATTC    |
| rbCL – P.r. – coding region | CGYTG.YTATGATATTGAATTAGTTCTCGTGAAGATAACCAATACATCCTTATATTC    |
| Consensus                   | TAYCMATTAGAYTTATTYGNAGAGGTYCTGTAYYAAATGCTTACTCTATMRITG       |
| rbCL – P. sp. (UTEX 787)    | TAYCMATTAGAYTTATTYGNAGAGGTYCTGTAYYAAATGCTTACTCTATMRITG       |
| rbCL – P.r. – coding region | TAYCMATTAGAYTTATTYGNAGAGGTYCTGTAYYAAATGCTTACTCTATMRITG       |
| Consensus                   | AAVGT.ATYGGRTTYAAGCTCTCTRYGTFTANGSYTAGAAGATCTNRCYCTACDN      |
| rbCL – P. sp. (UTEX 787)    | AAVGT.ATYGGRTTYAAGCTCTCTRYGTFTANGSYTAGAAGATCTNRCYCTACDN      |
| rbCL – P.r. – coding region | AAVGT.ATYGGRTTYAAGCTCTCTRYGTFTANGSYTAGAAGATCTNRCYCTACDN      |
| Consensus                   | GCCTTTCCTAAACCTTTTCAYGTGCTCCYCATGGGATTCAGTGAAGGKATAAGG       |
| rbCL – P. sp. (UTEX 787)    | GCCTTTCCTAAACCTTTTCAYGTGCTCCYCATGGGATTCAGTGAAGGKATAAGG       |
| rbCL – P.r. – coding region | GCCTTTCCTAAACCTTTTCAYGTGCTCCYCATGGGATTCAGTGAAGGKATAAGG       |
| Consensus                   | AATAAGTATGGACGACCTTTATTAGGTGTACAATTAACTAARTTAGGATTTCG        |
| rbCL – P. sp. (UTEX 787)    | AATAAGTATGGACGACCTTTATTAGGTGTACAATTAACTAARTTAGGATTTCG        |
| rbCL – P.r. – coding region | AATAAGTATGGACGACCTTTATTAGGTGTACAATTAACTAARTTAGGATTTCG        |
| Consensus                   | TAGAA.YTATGGGAGGCTGTTAGCAATGCTTCTGTGGTGAATTGATTCACCAAAAG     |
| rbCL – P. sp. (UTEX 787)    | TAGAA.YTATGGGAGGCTGTTAGCAATGCTTCTGTGGTGAATTGATTCACCAAAAG     |
| rbCL – P.r. – coding region | TAGAA.YTATGGGAGGCTGTTAGCAATGCTTCTGTGGTGAATTGATTCACCAAAAG     |
| Consensus                   | GATGA.AAAGCAATCTCAGCCTTTTATGAGATGCGTGATCGTTCTTTTGTGTG        |
| rbCL – P. sp. (UTEX 787)    | GATGA.AAAGCAATCTCAGCCTTTTATGAGATGCGTGATCGTTCTTTTGTGTG        |
| rbCL – P.r. – coding region | GATGA.AAAGCAATCTCAGCCTTTTATGAGATGCGTGATCGTTCTTTTGTGTG        |
| Consensus                   | TAAGCAATTTATAAGTCGCAAGCTGANNNNMAGAGTTAAAGGCAATTAYTAAATG      |
| rbCL – P. sp. (UTEX 787)    | TAAGCAATTTATAAGTCGCAAGCTGANNNNMAGAGTTAAAGGCAATTAYTAAATG      |
| rbCL – P.r. – coding region | TAAGCAATTTATAAGTCGCAAGCTGANNNNMAGAGTTAAAGGCAATTAYTAAATG      |
| Consensus                   | ACAGCAGGTACGTGTGAAGAAATGCTAAACCTGCTCAAGTTGTAAAGGATTAGGAG     |
| rbCL – P. sp. (UTEX 787)    | ACAGCAGGTACGTGTGAAGAAATGCTAAACCTGCTCAAGTTGTAAAGGATTAGGAG     |
| rbCL – P.r. – coding region | ACAGCAGGTACGTGTGAAGAAATGCTAAACCTGCTCAAGTTGTAAAGGATTAGGAG     |
| Consensus                   | CCTATTATATGACGATTTATATAACTGGTGGTTTACTGCTAATACATCTTTAGCTA     |
| rbCL – P. sp. (UTEX 787)    | CCTATTATATGACGATTTATATAACTGGTGGTTTACTGCTAATACATCTTTAGCTA     |
| rbCL – P.r. – coding region | CCTATTATATGACGATTTATATAACTGGTGGTTTACTGCTAATACATCTTTAGCTA     |
| Consensus                   | TTTTGTCGTGATCATGGATTACTTTACATATACATAGGCTATGCATGCCCTYATAG     |
| rbCL – P. sp. (UTEX 787)    | TTTTGTCGTGATCATGGATTACTTTACATATACATAGGCTATGCATGCCCTYATAG     |
| rbCL – P.r. – coding region | TTTTGTCGTGATCATGGATTACTTTACATATACATAGGCTATGCATGCCCTYATAG     |
| Consensus                   | CGCAAAAGATTCTGGNATTCATTYNSAGTTTATAGTAAGGKYTAGMATGCTCTG       |
| rbCL – P. sp. (UTEX 787)    | CGCAAAAGATTCTGGNATTCATTYNSAGTTTATAGTAAGGKYTAGMATGCTCTG       |
| rbCL – P.r. – coding region | CGCAAAAGATTCTGGNATTCATTYNSAGTTTATAGTAAGGKYTAGMATGCTCTG       |
| Consensus                   | GGAGATCATTTACACTCAGGAACAGTGGTGTAAAGCTTGAAGGTGATAGAGANTATG    |
| rbCL – P. sp. (UTEX 787)    | GGAGATCATTTACACTCAGGAACAGTGGTGTAAAGCTTGAAGGTGATAGAGANTATG    |
| rbCL – P.r. – coding region | GGAGATCATTTACACTCAGGAACAGTGGTGTAAAGCTTGAAGGTGATAGAGANTATG    |
| Consensus                   | ATAGGATTTGTAGATCTTATCCGATGAATCAATAGCTGACATCAAGGAGG           |
| rbCL – P. sp. (UTEX 787)    | ATAGGATTTGTAGATCTTATCCGATGAATCAATAGCTGACATCAAGGAGG           |
| rbCL – P.r. – coding region | ATAGGATTTGTAGATCTTATCCGATGAATCAATAGCTGACATCAAGGAGG           |
| Consensus                   | TTAYTTCAYNAAADTGGRTTTCAGGCCGNGGTGTATKCCGTTTTCAGYGGAGGT       |
| rbCL – P. sp. (UTEX 787)    | TTAYTTCAYNAAADTGGRTTTCAGGCCGNGGTGTATKCCGTTTTCAGYGGAGGT       |
| rbCL – P.r. – coding region | TTAYTTCAYNAAADTGGRTTTCAGGCCGNGGTGTATKCCGTTTTCAGYGGAGGT       |
| Consensus                   | ACATA.TYTGGAATAGCCTGCTCTTGTAGATATAATTGGTGATGATGATGATTACAG    |
| rbCL – P. sp. (UTEX 787)    | ACATA.TYTGGAATAGCCTGCTCTTGTAGATATAATTGGTGATGATGATGATTACAG    |
| rbCL – P.r. – coding region | ACATA.TYTGGAATAGCCTGCTCTTGTAGATATAATTGGTGATGATGATGATTACAG    |
| Consensus                   | TGGCGGAGGAACCTCTGGTCATCCATGGGGTAATGCTCTGGAGCTGTGGTAACCGA     |
| rbCL – P. sp. (UTEX 787)    | TGGCGGAGGAACCTCTGGTCATCCATGGGGTAATGCTCTGGAGCTGTGGTAACCGA     |
| rbCL – P.r. – coding region | TGGCGGAGGAACCTCTGGTCATCCATGGGGTAATGCTCTGGAGCTGTGGTAACCGA     |
| Consensus                   | GGCAT.TAGAAAGCTGGTATTAGCTCGTAACGCGGTAGCGATTATCACGAGATGG      |
| rbCL – P. sp. (UTEX 787)    | GGCAT.TAGAAAGCTGGTATTAGCTCGTAACGCGGTAGCGATTATCACGAGATGG      |
| rbCL – P.r. – coding region | GGCAT.TAGAAAGCTGGTATTAGCTCGTAACGCGGTAGCGATTATCACGAGATGG      |
| Consensus                   | TAATA.TTATTCGTGAAGCTACACAATTCAAGTCCAGAAATTAGCTGCCGTGCTGAAGTT |
| rbCL – P. sp. (UTEX 787)    | TAATA.TTATTCGTGAAGCTACACAATTCAAGTCCAGAAATTAGCTGCCGTGCTGAAGTT |
| rbCL – P.r. – coding region | TAATA.TTATTCGTGAAGCTACACAATTCAAGTCCAGAAATTAGCTGCCGTGCTGAAGTT |
| Consensus                   | GCAAT.CAATTGAATTTAATTTCAAGCAGTAGATACAGTTTAA                  |
| rbCL – P. sp. (UTEX 787)    | GCAAT.CAATTGAATTTAATTTCAAGCAGTAGATACAGTTTAA                  |
| rbCL – P.r. – coding region | GCAAT.CAATTGAATTTAATTTCAAGCAGTAGATACAGTTTAA                  |
